# Supplementary material for: Analysis and differentiation of tobacco-derived and synthetic nicotine products: Addressing an urgent regulatory issue
Source: PubMed Central journal article supplement (PMC9009602; doi:10.1371/journal.pone.0267049), 2022-04-14
Supplement: pone.0267049.s001.pdf [file pone.0267049.s001.pdf]

S1 Table. Tabulated analyte data for tobacco-derived and synthetic nicotine samples. Where analytes were determined in triplicate, the values are presented as "average ± standard deviation".

| Analyte Group                  | Analyte (unit of measure)       | LOD   | LOQ  | Tobacco-Derived Nicotines (TDN) |                   |                              |                         | Synthetic Nicotines (SyN) |                         |                          |                             |
|--------------------------------|---------------------------------|-------|------|---------------------------------|-------------------|------------------------------|-------------------------|---------------------------|-------------------------|--------------------------|-----------------------------|
|                                |                                 |       |      | TDN-1                           | TDN-2             | TDN-3                        | TDN-4                   | SyN-1                     | SyN-2                   | SyN-3                    | SyN-4                       |
| Nicotine Degradants            | Anabasine (µg/g)                | 0.100 | 1.00 | 39.3 ± 1.2                      | ND                | ND                           | 768 ± 17                | ND                        | ND                      | ND                       | ND                          |
|                                | Anatabine (µg/g)                | 0.050 | 0.50 | 14.3 ± 0.1                      | ND                | 0.0823 <sup>a</sup> ± 0.0126 | 910 ± 17                | ND                        | ND                      | ND                       | 0.0690 <sup>a</sup> ± 0.003 |
|                                | beta-Nicotyrine (µg/g)          | 0.027 | 2.65 | ND                              | ND                | ND                           | 81.1 ± 2.4              | ND                        | ND                      | 20.4 ± 1.6               | ND                          |
|                                | Cotinine(µg/g)                  | 0.100 | 1.00 | 884 ± 5                         | 161 ± 2           | 378 ± 2                      | 2313 ± 36               | 150 ± 2                   | 141 ± 2                 | 2055 ± 30                | 378 ± 14                    |
|                                | Mysomine (µg/g)                 | 0.099 | 0.99 | 1340 ± 13                       | 243 ± 7           | 366 ± 4                      | 2806 ± 47               | 290 ± 3                   | 285 ± 3                 | 2171 ± 22                | 376 ± 18                    |
|                                | Nicotine <i>N</i> -Oxide (µg/g) | 0.010 | 0.10 | 109 ± 1                         | 5.89 ± 0.58       | 17.5 ± 0.7                   | 447 ± 8                 | 8.21 ± 0.16               | 2.65 ± 0.13             | 85.1 ± 2.5               | 11.8 ± 3.8                  |
|                                | Normicotine (µg/g)              | 0.099 | 0.99 | 399 ± 8                         | 12.8 ± 0.4        | 7.61 ± 0.51                  | 588 ± 6                 | 19.2 ± 0.7                | 16.0 ± 0.5              | 46.3 ± 1.5               | 13.1 ± 0.6                  |
| Metals                         | As (ng/g)                       | 9.91  | 49.6 | ND                              | ND                | ND                           | ND                      | ND                        | ND                      | ND                       | ND                          |
|                                | Be (ng/g)                       | 2.18  | 19.8 | ND                              | ND                | ND                           | ND                      | ND                        | ND                      | ND                       | ND                          |
|                                | Cd (ng/g)                       | 0.991 | 4.96 | ND                              | ND                | ND                           | ND                      | ND                        | ND                      | ND                       | ND                          |
|                                | Cr (ng/g)                       | 9.91  | 49.6 | ND                              | ND                | ND                           | ND                      | ND                        | 10.3 <sup>a</sup> ± 0.7 | ND                       | ND                          |
|                                | Co (ng/g)                       | 0.496 | 4.96 | ND                              | ND                | ND                           | ND                      | ND                        | ND                      | ND                       | ND                          |
|                                | Cu (ng/g)                       | 24.8  | 74.3 | ND                              | ND                | ND                           | 205 ± 8                 | ND                        | ND                      | ND                       | ND                          |
|                                | Fe (ng/g)                       | 99.1  | 198  | ND                              | ND                | ND                           | 115 ± 39                | ND                        | ND                      | ND                       | ND                          |
|                                | Pb (ng/g)                       | 2.48  | 9.91 | ND                              | ND                | ND                           | ND                      | ND                        | ND                      | ND                       | ND                          |
|                                | Ni (ng/g)                       | 4.96  | 9.91 | ND                              | ND                | ND                           | ND                      | ND                        | ND                      | ND                       | ND                          |
|                                | Se (ng/g)                       | 3.84  | 19.7 | ND                              | ND                | ND                           | ND                      | ND                        | ND                      | 8.38 <sup>a</sup> ± 1.9  | ND                          |
|                                | Ag (ng/g)                       | 0.991 | 4.96 | ND                              | ND                | ND                           | ND                      | ND                        | ND                      | ND                       | ND                          |
|                                | Sn (ng/g)                       | 9.91  | 49.6 | ND                              | ND                | ND                           | ND                      | ND                        | ND                      | 9.72 <sup>a</sup> ± 3.65 | ND                          |
|                                | Zn (ng/g)                       | 49.6  | 99.1 | ND                              | ND                | 1181 ± 7                     | 92.0 <sup>a</sup> ± 8.8 | 56.7 <sup>a</sup> ± 5.6   | ND                      | ND                       | ND                          |
| Pd (ng/g)                      | 90.0                            | 200   | ND   | ND                              | ND                | ND                           | ND                      | ND                        | ND                      | ND                       |                             |
| Chiral Nicotine                | ( <i>S</i> )-Nicotine (%)       | NA    | NA   | 99.4                            | 99.3              | 99.4                         | 99.2                    | 50.2                      | 99.1                    | 99.7                     | 99.1                        |
|                                | ( <i>R</i> )-Nicotine (%)       | NA    | NA   | 0.6                             | 0.7               | 0.6                          | 0.8                     | 49.8                      | 0.9                     | 0.3                      | 0.9                         |
| Chiral Normicotine             | ( <i>S</i> )-Normicotine (%)    | NA    | NA   | 67.2                            | 85.9 <sup>b</sup> | 80.9 <sup>b</sup>            | 68.7                    | 50.4                      | 100.0                   | 100 <sup>b</sup>         | 100 <sup>b</sup>            |
|                                | ( <i>R</i> )-Normicotine (%)    | NA    | NA   | 32.8                            | 14.1 <sup>b</sup> | 19.1 <sup>b</sup>            | 31.3                    | 49.6                      | ND                      | ND <sup>b</sup>          | ND <sup>b</sup>             |
| Radiocarbon ( <sup>14</sup> C) | Percent Modern Carbon (%)       | NA    | NA   | 101.5                           | 101.5             | 100.8                        | 104.7                   | 35.3                      | 35.9                    | 34.7                     | 35.9                        |

**Notes**

A superscript "a" denotes a value below the limit of quantitation (LOQ)

A superscript "b" indicates the sample extract had very poor chromatography that prevented accurate quantitation

ND indicates no analyte was detected, i.e. was below the limit of detection (LOD)
